# Supplementary material
Source: MDPI journal article supplement (https://www.mdpi.com/2073-4395/13/5/1409)
Supplement: s1 [file s1]

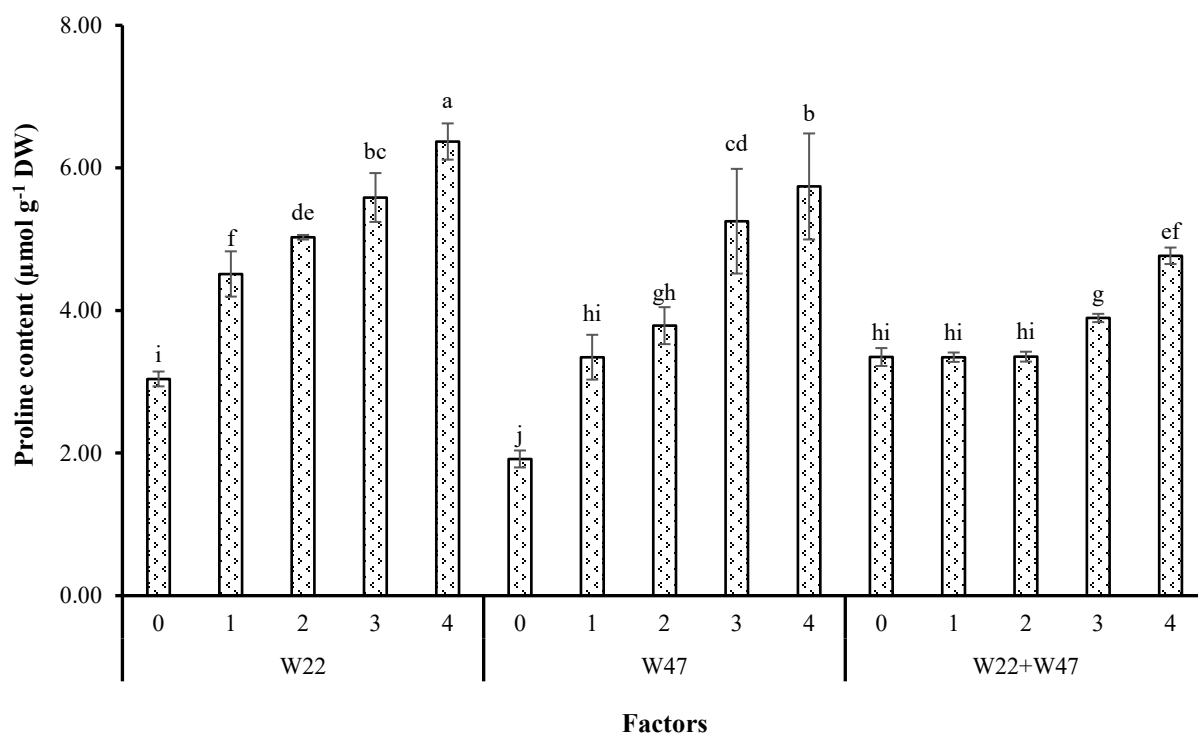

**Fig. 1** Influences of  $\delta$ -aminolevulinic acid producing purple non-sulfur bacteria and frequencies of applying saline irrigation on proline content in rice cultivated in salt-contaminated soil in Thanh Phu, Ben Tre under greenhouse condition

*Note: 0: no saline irrigation; 1: saline irrigation once; 2: saline irrigation twice; 3: saline irrigation three times; 4: saline irrigation four times; W22: supplying with the single strain of *L. sphaeroides* W22; W47: supplying with the single strain of *L. sphaeroides* W47; W22+W47: supplying with the mixture of W22 and W47; DW: Dry weight.*
